# Supplementary material for: Prehospital identification of ST-segment elevation myocardial infarction and mortality (ANZACS-QI 61)
Source: HighWire-hosted journal article supplement (doi:10.1136/openhrt-2021-001868), 2022-01-01
Supplement: openhrt-2021-001868supp001_data_supplement.pdf [file openhrt-2021-001868supp001_data_supplement.pdf]

**SUPPLEMENTARY APPENDIX**

Table S1: List of ICD codes for ACS and other CHD

| ACS Type          | ICD codes | Description                                                                                                                                        |
|-------------------|-----------|----------------------------------------------------------------------------------------------------------------------------------------------------|
| STEMI             | I210      | Acute transmural myocardial infarction of anterior wall                                                                                            |
|                   | I211      | Acute transmural myocardial infarction of inferior wall                                                                                            |
|                   | I212      | Acute transmural myocardial infarction of other sites                                                                                              |
|                   | I213      | Acute transmural myocardial infarction of unspecified site                                                                                         |
|                   | I220      | Subsequent myocardial infarction of anterior wall                                                                                                  |
|                   | I221      | Subsequent myocardial infarction of inferior wall                                                                                                  |
|                   | I228      | Subsequent myocardial infarction of other sites                                                                                                    |
|                   | I229      | Subsequent myocardial infarction of unspecified site                                                                                               |
| NSTEMI            | I214      | Acute subendocardial myocardial infarction                                                                                                         |
|                   | I222      | Subsequent non-ST elevation (NSTEMI) myocardial infarction                                                                                         |
| USA               | I200      | Unstable angina                                                                                                                                    |
| MI<br>Unspecified | I219      | Acute myocardial infarction, unspecified                                                                                                           |
| Other CHD         | I201      | Angina pectoris with documented spasm                                                                                                              |
|                   | I208      | Other forms of angina pectoris                                                                                                                     |
|                   | I209      | Angina pectoris, unspecified                                                                                                                       |
|                   | I230      | Haemopericardium as current complication following acute myocardial infarction<br><br>Atrial septal defect as current complication following acute |

|      |                                                                |
|------|----------------------------------------------------------------|
| I231 | myocardial infarction                                          |
|      | Ventricular septal defect as current complication following    |
| I232 | acute myocardial infarction                                    |
|      | Rupture of cardiac wall without haemopericardium as current    |
| I233 | complication following acute MI                                |
|      | Rupture of chordae tendineae as current complication following |
| I234 | acute myocardial infarction                                    |
|      | Rupture of papillary muscle as current complication following  |
| I235 | acute myocardial infarction                                    |
|      | Thrombosis of atrium, auricular appendage, and ventricle as    |
| I236 | current complications following acute MI                       |
|      | Other current complications following acute myocardial         |
| I238 | infarction                                                     |
|      | Coronary thrombosis not resulting in myocardial infarction     |
| I240 | Other forms of acute ischaemic heart disease                   |
| I248 | Acute ischaemic heart disease, unspecified                     |
| I249 | Aneurysm of heart                                              |
| I253 | Coronary artery aneurysm                                       |
| I254 | Ischaemic cardiomyopathy                                       |
| I255 | Silent myocardial ischaemia                                    |
| I256 | Cardiac arrest with successful resuscitation                   |
| I460 | Cardiac arrest, unspecified                                    |
| I469 |                                                                |

CHD: coronary heart disease

Appendix Figure 1: Flow chart summarising cohort construction

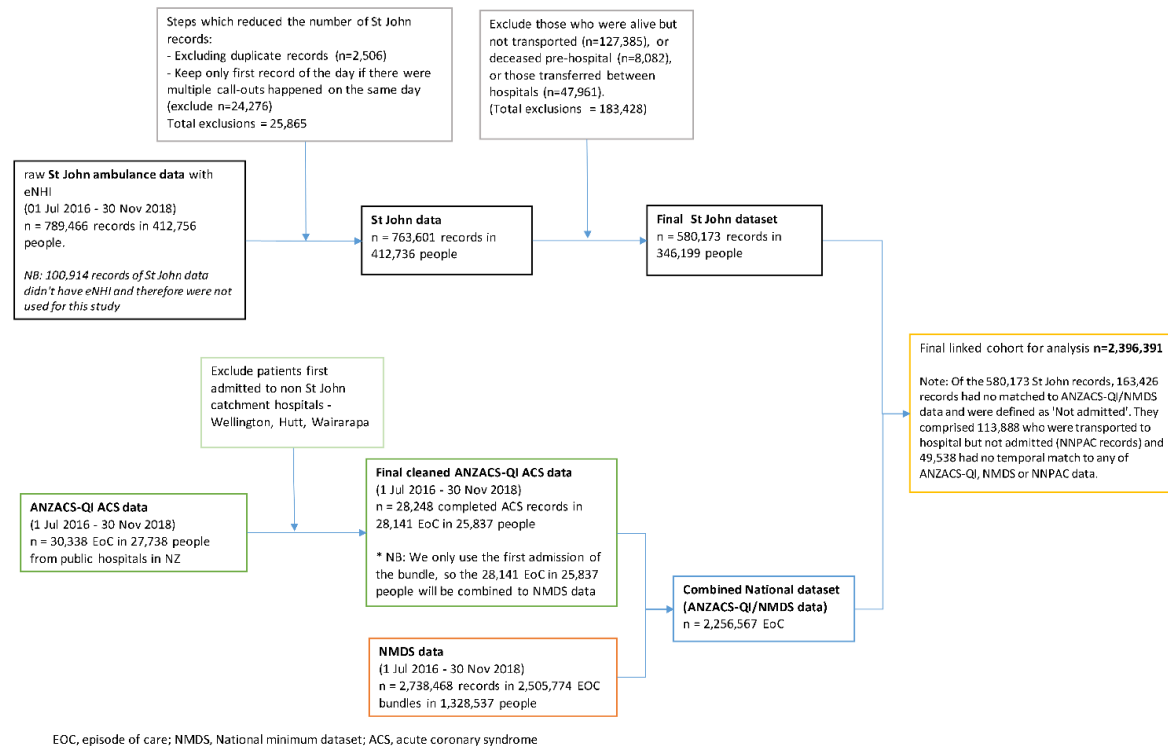

Appendix Table 2: Characteristics of patients with a first presentation with a STEMI diagnosis according to the initial St John clinical impressions and method of transport to hospital.

|                        | <b>St John suspected STEMI</b><br>(n=1,982) | <b>St John other suspected cardiac</b><br>(n=737) | <b>St John suspected non cardiac condition</b><br>(n=1,109) | <b>P value</b><br>(1 vs 2) | <b>P value</b><br>(1 vs 3) | <b>P value</b><br>(2 vs 3) | <b>Transported by St John</b><br>(n=3,828) | <b>Self presented</b><br>(n=1,378) | <b>P value</b> |
|------------------------|---------------------------------------------|---------------------------------------------------|-------------------------------------------------------------|----------------------------|----------------------------|----------------------------|--------------------------------------------|------------------------------------|----------------|
| Age (years), Mean (SD) | 66.3 (13.5)                                 | 68.4 (13.8)                                       | 72.6 (14.5)                                                 | <.001                      | <.001                      | <.001                      | 68.5 (14.1)                                | 64.3 (13.6)                        | <.001          |
| Age group, n (%)       |                                             |                                                   |                                                             |                            |                            |                            |                                            |                                    |                |
| <45                    | 105 (5.3)                                   | 27 (3.7)                                          | 37 (3.3)                                                    |                            |                            |                            | 169 (4.4)                                  | 84 (6.1)                           |                |
| 45 -54                 | 280 (14.1)                                  | 101 (13.7)                                        | 105 (9.5)                                                   |                            |                            |                            | 486 (12.7)                                 | 256 (18.6)                         |                |
| 55-64                  | 525 (26.5)                                  | 160 (21.7)                                        | 176 (15.9)                                                  | 0.004                      | <.001                      | <.001                      | 861 (22.5)                                 | 365 (26.5)                         | <.001          |
| 65-74                  | 493 (24.9)                                  | 187 (25.4)                                        | 245 (22.1)                                                  |                            |                            |                            | 925 (24.2)                                 | 347 (25.2)                         |                |
| 75-84                  | 386 (19.5)                                  | 160 (21.7)                                        | 280 (25.3)                                                  |                            |                            |                            | 826 (21.6)                                 | 225 (16.3)                         |                |
| 85+                    | 193 (9.7)                                   | 102 (13.8)                                        | 266 (24.0)                                                  |                            |                            |                            | 561 (14.7)                                 | 101 (7.3)                          |                |
| Female, n (%)          | 620 (31.3)                                  | 254 (34.5)                                        | 479 (43.2)                                                  | 0.114                      | <.001                      | <.001                      | 1353 (35.3)                                | 405 (29.4)                         | <.001          |
| Ethnicity, n (%)       |                                             |                                                   |                                                             |                            |                            |                            |                                            |                                    |                |
| Maori                  | 178 (9.0)                                   | 69 (9.4)                                          | 137 (12.4)                                                  |                            |                            |                            | 384 (10.0)                                 | 217 (15.8)                         |                |
| Pacific                | 76 (3.8)                                    | 25 (3.4)                                          | 79 (7.1)                                                    | 0.983                      | <.001                      | <.001                      | 180 (4.7)                                  | 81 (5.9)                           | <.001          |
| Indian                 | 85 (4.3)                                    | 32 (4.3)                                          | 29 (2.6)                                                    |                            |                            |                            | 146 (3.8)                                  | 81 (5.9)                           |                |
| Other Asian            | 78 (3.9)                                    | 28 (3.8)                                          | 25 (2.3)                                                    |                            |                            |                            | 131 (3.4)                                  | 71 (5.2)                           |                |
| European/Other         | 1565 (79.0)                                 | 583 (79.1)                                        | 839 (75.7)                                                  |                            |                            |                            | 2987 (78.0)                                | 928 (67.3)                         |                |
| NZ Dep13, n (%)        |                                             |                                                   |                                                             |                            |                            |                            |                                            |                                    |                |
| 1-2                    | 324 (16.3)                                  | 124 (16.8)                                        | 172 (15.5)                                                  |                            |                            |                            | 620 (16.2)                                 | 221 (16.0)                         |                |
| 3-4                    | 372 (18.8)                                  | 131 (17.8)                                        | 193 (17.4)                                                  |                            |                            |                            | 696 (18.2)                                 | 247 (17.9)                         |                |
| 5-6                    | 381 (19.2)                                  | 137 (18.6)                                        | 209 (18.8)                                                  | 0.817                      | 0.570                      | 0.969                      | 727 (19.0)                                 | 231 (16.8)                         | 0.085          |
| 7-8                    | 448 (22.6)                                  | 162 (22.0)                                        | 247 (22.3)                                                  |                            |                            |                            | 857 (22.4)                                 | 287 (20.8)                         |                |
| 9-10                   | 433 (21.8)                                  | 176 (23.9)                                        | 269 (24.3)                                                  |                            |                            |                            | 878 (22.9)                                 | 360 (26.1)                         |                |
| Missing                | 24 (1.2)                                    | 7 (0.9)                                           | 19 (1.7)                                                    |                            |                            |                            | 50 (1.3)                                   | 33 (2.2)                           |                |

|                                                                           |                  |                  |                  |       |       |       |                  |            |       |
|---------------------------------------------------------------------------|------------------|------------------|------------------|-------|-------|-------|------------------|------------|-------|
| Hospital status, n (%)                                                    |                  |                  |                  |       |       |       |                  |            |       |
| Primary PCI centre                                                        | 1386 (69.9)      | 478 (64.9)       | 686 (61.9)       |       |       |       | 2550 (66.6)      | 928 (67.3) |       |
| Non primary PCI centre                                                    | 540 (27.3)       | 218 (29.6)       | 367 (33.1)       | 0.001 | <.001 | 0.275 | 1125 (29.4)      | 393 (28.5) | 0.822 |
| Rural hospital without cathlab                                            | 56 (2.8)         | 41 (5.6)         | 56 (5.0)         |       |       |       | 153 (4.0)        | 57 (4.1)   |       |
| System time (from the first medical contact to arrival at hospital, mins) |                  |                  |                  |       |       |       |                  |            |       |
| n                                                                         | 1972             | 734              | 1098             | 0.198 | <.001 | <.001 | 3804             | -          | -     |
| Mean (SD)                                                                 | 62.6 (33.8)      | 60.1 (29.8)      | 67.6 (35.8)      |       |       |       | 63.6 (33.7)      |            |       |
| Median (IQR)                                                              | 54.7 (41.9-74.0) | 53.9 (40.7-71.6) | 59.1 (44.3-80.9) |       |       |       | 55.8 (42.4-76.0) |            |       |
| Non-cardiac Charlson                                                      |                  |                  |                  |       |       |       |                  |            |       |
| 0                                                                         | 1546 (78.0)      | 520 (70.6)       | 595 (53.7)       | <.001 | <.001 | <.001 | 2661 (69.5)      | 996 (72.3) | 0.064 |
| 1-2                                                                       | 317 (16.0)       | 141 (19.1)       | 281 (25.3)       |       |       |       | 739 (19.3)       | 227 (16.5) |       |
| 3+                                                                        | 119 (6.0)        | 76 (10.3)        | 233 (21.0)       |       |       |       | 428(11.2)        | 155 (11.2) |       |
| Coronary intervention status                                              |                  |                  |                  |       |       |       |                  |            |       |
| No Cath                                                                   | 208 (10.5)       | 137 (18.6)       | 556 (50.1)       | <.001 | <.001 | <.001 | 901 (23.5)       | 309 (22.4) | 0.170 |
| Cath with intervention                                                    | 1604 (80.9)      | 507 (68.8)       | 425 (38.3)       |       |       |       | 2536 (63.3)      | 904 (65.6) |       |
| Cath without intervention                                                 | 170 (8.6)        | 93 (12.6)        | 128 (11.5)       |       |       |       | 391 (10.2)       | 165 (12.0) |       |

NZDep13, New Zealand deprivation index 2013;PCI, percutaneous coronary intervention; Cath, catheterisation laboratory

Appendix Table 3: Proportion of patients with a final diagnosis of STEMI who were transported by ambulance with a paramedic suspected STEMI.

|                        | Final STEMIs transported by ambulance / All final diagnoses of STEMI | Ambulance final STEMIs with suspected STEMI pre-hospital/ All ambulance final STEMI | Final STEMIs transported by ambulance and suspected of STEMI pre-hospital / all final STEMI |
|------------------------|----------------------------------------------------------------------|-------------------------------------------------------------------------------------|---------------------------------------------------------------------------------------------|
| All                    | 3989/5465 (73.0%)                                                    | 2016/3989 (50.5%)                                                                   | 2016/5465 (36.9%)                                                                           |
| Age group, years       |                                                                      |                                                                                     |                                                                                             |
| <45                    | 176/264 (66.7%)                                                      | 106/176 (60.2%)                                                                     | 106/264 (40.2%)                                                                             |
| 45-54                  | 496/766 (64.8%)                                                      | 281/496 (56.7%)                                                                     | 281/766 (36.7%)                                                                             |
| 55-64                  | 896/1287 (69.6%)                                                     | 534/896 (59.6%)                                                                     | 534/1287 (41.5%)                                                                            |
| 65-74                  | 963/1344 (71.7%)                                                     | 501/963 (52.0%)                                                                     | 501/1344 (37.3%)                                                                            |
| 75-84                  | 863/1101 (78.4%)                                                     | 393/863 (45.5%)                                                                     | 393/1101 (35.7%)                                                                            |
| 85+                    | 595/703 (84.6%)                                                      | 201/595 (33.8%)                                                                     | 201/703 (28.6%)                                                                             |
| Gender                 |                                                                      |                                                                                     |                                                                                             |
| Male                   | 2570/3606 (71.3%)                                                    | 1382/2570 (53.8%)                                                                   | 1382/3606 (38.3%)                                                                           |
| Female                 | 1419/1859 (76.3%)                                                    | 634/1419 (44.7%)                                                                    | 634/1859 (34.1%)                                                                            |
| Ethnicity              |                                                                      |                                                                                     |                                                                                             |
| Māori                  | 410/642 (63.9%)                                                      | 184/410 (44.9%)                                                                     | 184/642 (28.7%)                                                                             |
| Pacific                | 192/277 (69.3%)                                                      | 80/192 (41.7%)                                                                      | 80/277 (28.9%)                                                                              |
| Indian                 | 151/235 (64.3%)                                                      | 86/151 (57.0%)                                                                      | 86/235 (36.6%)                                                                              |
| Other Asian            | 136/210 (64.8%)                                                      | 79/136 (58.1%)                                                                      | 79/210 (37.6%)                                                                              |
| European/Other         | 3100/4101 (75.6%)                                                    | 1587/3100 (51.2%)                                                                   | 1587/4101 (38.7%)                                                                           |
| NZ Dep13               |                                                                      |                                                                                     |                                                                                             |
| 1-2 (least deprived)   | 624/848 (73.6%)                                                      | 327/624 (52.4%)                                                                     | 327/848 (38.6%)                                                                             |
| 3-4                    | 704/955 (73.7%)                                                      | 375/704 (53.3%)                                                                     | 375/955 (39.3%)                                                                             |
| 5-6                    | 735/967 (76.0%)                                                      | 385/735 (52.4%)                                                                     | 385/967 (39.8%)                                                                             |
| 7-8                    | 864/1155 (74.8%)                                                     | 452/864 (52.3%)                                                                     | 452/1155 (39.1%)                                                                            |
| 9-10 (most deprived)   | 896/1261 (71.1%)                                                     | 439/896 (49.0%)                                                                     | 439/1261 (34.8%)                                                                            |
| Missing                | 166/279 (59.5%)                                                      | 38/166 (22.9%)                                                                      | 38/279 (13.6%)                                                                              |
| Hospital status        |                                                                      |                                                                                     |                                                                                             |
| Primary PCI centre     | 2649/3636 (72.9%)                                                    | 1408/2649 (53.2%)                                                                   | 1408/3636 (38.7%)                                                                           |
| Non primary PCI centre | 1181/1609 (73.4%)                                                    | 551/1181 (46.7%)                                                                    | 551/1609 (34.2%)                                                                            |
| Rural hospital without | 159/220 (72.3%)                                                      | 57/159 (35.8%)                                                                      | 57/220 (25.9%)                                                                              |

|                              |                   |                   |                   |
|------------------------------|-------------------|-------------------|-------------------|
| cathlab                      |                   |                   |                   |
| Non-cardiac Charlson index   |                   |                   |                   |
| 0                            | 2711/3754 (72.2%) | 1551/2711 (57.2%) | 1551/3754 (41.3%) |
| 1-2                          | 788/1040 (75.8%)  | 326/788 (41.4%)   | 326/1040 (31.3%)  |
| 3+                           | 490/671 (73.0%)   | 139/490 (28.4%)   | 139/671 (20.7%)   |
| Coronary intervention status |                   |                   |                   |
| No Cath                      | 1074/1455 (73.8%) | 270/1074 (25.1%)  | 270/1455 (18.6%)  |
| Cath with intervention       | 2505/3435 (72.9%) | 1574/2505 (62.8%) | 1574/3435 (45.8%) |
| Cath without intervention    | 410/575 (71.3%)   | 172/410 (42.0%)   | 172/575 (29.9%)   |
